# Supplementary material for: gIncrease In Hypertension Control Rate following the Training of the Latest National- International Hypertension Management Guidelines for General Practitioners
Source: Research Square preprint supplement (doi:10.21203/rs.3.rs-7192375/v1), 2025-09-11
Supplement: Supplementary file 1 [file 4f4e4f841ff01d01d12ba456.docx]

Informed Consent Form

Dear Citizen,

Hello,

This study is designed to help patients with hypertension more quickly reach a normal blood pressure level. Your selection as a participant in this study was done randomly. In this research, your physician will be trained to treat your blood pressure based on the latest standard guidelines. Your blood pressure will be measured before and after your physician's training, and you will be asked questions about your general characteristics and medical history. We kindly ask for your participation in this research and for your continued cooperation until its completion.

I, ...................................................., based on the information provided, have been informed about the objectives and details of this research and consent to participate in it.

Date:

Signature:

Questionnaire for Patients in the Study on the Effect of Applying National and International Hypertension Treatment Guidelines on its Control in Patients Undergoing Treatment (Phase I Evaluation)

| ID1 | Center Name: | |
| --- | --- | --- |
| ID2 | Patient Code: |
| ID3 | Patient's Doctor's Name: | |
| ID4 | First Name: | |
| ID5 | Last Name: | |
| ID6 | National Code: | |
| ID7 | Address: | |
| ID8 | Home Phone: | |
| ID9 | Mobile Phone: | |
| ID10 | Questionnaire Completion Date: ....../....../...... | |

| **Demographic Information (DM)** | | | | | |
| --- | --- | --- | --- | --- | --- |
| DM1 | | Date of Birth: | | | |
| DM2 | | Age: ....................... years | | | |
| DM3 | | Gender: Male Female | | | |
| DM4 | | Education:   1. Illiterate 2. Primary 3. Middle School 4. High School or Diploma 5. Associate Degree 6. Bachelor's Degree 7. Master's Degree 8. Doctorate 9. Seminary Education 10. Literacy Movement | | | |
| DM5 | | Number of successfully completed years of education: | | | |
| DM6 | | Occupation: | | | |
| DM7 | | Type of Occupation:   1. Government 2. Self-employed 3. Unemployed 4. Housewife 5. Unemployed retired 6. Employed retired 7. Student | | | |
| DM8 | | Home Ownership Status:   1. Private villa 2. Private apartment 3. Rented 4. Organizational | | | |
| DM9 | | What is the average monthly household income in Tomans? (Refers to the total money entering the home per month)   1. Less than 500 thousand 2. 500 to 900 thousand 3. 900 thousand to 1.5 million 4. 1.5 to 2 million 5. 2 to 3 million 6. 3 to 5 million 7. 5 to 10 million 8. More than 10 million | | | |
| DM10 | | How do you assess your income status?   1. Poor 2. Average 3. Good | | | |
|  | | Are the following items and facilities available in your home? | | 1)بلی | 2)خیر |
| DM11 | | Desktop computer | |  |  |
| DM12 | | Laptop | |  |  |
| DM13 | | Microwave | |  |  |
| DM14 | | Dishwasher | |  |  |
| DM15 | | LCD/LED TV | |  |  |
| DM16 | | Car | |  |  |
| DM17 | | Internet access | |  |  |
| DM18 | | Separate freezer | |  |  |
| DM19 | | Vacuum cleaner | |  |  |
| DM20 | | Automatic washing machine | |  |  |
| DM21 | | Air conditioner | |  |  |
| DM22 | | Number of bathrooms in the house: | | | |
| DM23 | | Number of toilets in the house: | | | |
| DM24 | | Number of non-academic books read in the past year: | | | |
| DM25 | | Number of academic books read in the past year: | | | |
| DM26 | | Number of domestic trips in the past year: | | | |
| DM27 | | Number of foreign pilgrimage trips in the past year: | | | |
| DM28 | | Number of foreign non-pilgrimage trips in the past year: | | | |
| **Risk Factors (RF)** | | | | | |
| RF1 | Do you smoke?   1. I have never smoked 2. I am currently smoking 3. I used to smoke but have quit | | | | |
| RF2 | If you are currently smoking, number of cigarettes smoked per day: | | | | |
| RF3 | If you are currently smoking, how long have you been smoking? ...... days ...... months ...... years | | | | |
| RF4 | If you have quit smoking, how long have you quit? ...... days ...... months ...... years | | | | |
| RF5 | Do you have physical activity during the week?   1. Yes 2. No | | | | |
| RF6 | If you have physical activity during the week, what type of activity?   1. Walking 2. Running 3. Cycling 4. Aerobics 5. Football 6. Volleyball 7. Other | | | | |
| RF7 | If you have daily physical activity, duration of activity per day: | | | | |
| RF8 | If you have physical activity during the week, duration of activity per week: | | | | |
| RF9 | How do you generally consume food in terms of salt content?   1. No salt 2. Low salt 3. Normal 4. Salty | | | | |
| RF10 | Do you add salt to your food at the table?   1. Never 2. When the food is low in salt 3. Almost always before tasting the food | | | | |
| RF11 | Do you have high blood lipids? 1) Yes, 2) No, 3) I don't know | | | | |
| RF12 | If you have high blood lipids, do you take medication to control it? 1) Yes, 2) No | | | | |
| RF13 | Do you have diabetes? 1) Yes, 2) No, 3) I don't know | | | | |
| RF14 | If you have diabetes, do you take medication to control it? 1) Yes, 2) No | | | | |
| RF15 | Do you have lung disease? 1) Yes, 2) No, 3) I don't know | | | | |
| RF16 | If you have lung disease, do you take medication to control it? 1) Yes, 2) No | | | | |
| RF17 | History of stroke? 1) Yes, 2) No, 3) I don't know | | | | |
| RF18 | History of heart attack? 1) Yes, 2) No, 3) I don't know | | | | |
| RF19 | History of hypertension in first-degree relatives (mother, father, sister, brother)? 1) Yes, 2) No, 3) I don't know | | | | |
| RF20 | History of cardiovascular diseases in first-degree relatives (mother, father, sister, brother)? 1) Yes, 2) No, 3) I don't know | | | | |
| RF21B | How do you generally assess your overall health status? 1) Very good, 2) Good, 3) Average, 4) Bad, 5) Very bad | | | | |
| **Hypertension Status (HTN)** | | | | | |
| HTN1 | | | Do you have information about hypertension treatment methods?   - Yes - No | | |
| HTN2 | | | In your opinion, which treatments are used to control blood pressure?   - Medication - Non-medication treatment (healthy lifestyle, salt control, physical activity, etc.) - Both | | |
| HTN3 | | | At what age were you diagnosed with hypertension? | | |
| HTN4B | | | : Number of visits for blood pressure treatment with a general practitioner at the health center in the past year: | | |
| HTN5B | | | Number of visits for blood pressure treatment with a general practitioner outside the health center in the past year: | | |
| HTN6B | | | Number of visits for blood pressure treatment with a specialist in the past year: | | |
| HTN7B | | | If you have been seen by a specialist, what type of specialist was it? | | |
| HTN8B | | | : Are you currently taking blood pressure medication?   - Yes, regularly - Yes, irregularly - No | | |
| HTN9B | | | How many medications do you take per day to control your blood pressure? | | |

List of medications currently used to control the patient's blood pressure (To be completed by referring to the patient's file, insurance booklet, doctor's prescription, and medication box)

| **Name of medications** | | **Dosage** | | **Medication Schedule** | | | | | | | |
| --- | --- | --- | --- | --- | --- | --- | --- | --- | --- | --- | --- |
| **Morning** | | **Noon** | | **Afternoon** | | **Evening** | |
| T1B |  | TZ1B |  | TT11B |  | TT12B |  | TT13B |  | TT14B |  |
| T2B |  | TZ2B |  | TT21B |  | TT22B |  | TT23B |  | TT24B |  |
| T3B |  | TZ3B |  | TT31B |  | TT32B |  | TT33B |  | TT34B |  |
| T4B |  | TZ4B |  | TT41B |  | TT42B |  | TT43B |  | TT44B |  |
| T5B |  | TZ5B |  | TT51B |  | TT52B |  | TT53B |  | TT54B |  |
| T6B |  | TZ6B |  | TT61B |  | TT62B |  | TT63B |  | TT64B |  |
| T7B |  | TZ7B |  | TT71B |  | TT72B |  | TT73B |  | TT74B |  |
| T8B |  | TZ8B |  | TT81B |  | TT82B |  | TT83B |  | TT84B |  |

| **Medication adherence (Drug Adherence)** | | **Yes** | **No** |
| --- | --- | --- | --- |
| DA1B | Have you ever forgotten to take your blood pressure medication? |  |  |
| DA2B | In the past two weeks, was there a day when you did not take your blood pressure medications? |  |  |
| DA3B | Have you ever felt worse after taking your blood pressure medications and, without consulting a doctor, stopped taking them or reduced the amount? |  |  |
| DA4B | Have you ever forgotten to take your blood pressure medication while traveling or away from home? |  |  |
| DA5B | Have you ever stopped taking your medications when you felt your blood pressure was under control? |  |  |
| DA6B | Have you ever run out of medication and waited a few days to follow up and continue your blood pressure treatment? |  |  |
| DA7B | Do you have trouble remembering that you have received all your blood pressure medications? |  |  |
| DA8B | Did you not receive your blood pressure medications yesterday? |  |  |

| Blood Pressure Table | Right Arm | | | | Left Arm | | | | Pulse | |
| --- | --- | --- | --- | --- | --- | --- | --- | --- | --- | --- |
| **Systolic BP** | | Diastolic BP | | Systolic BP | | Diastolic BP | |
| 1st Reading | SP1RB |  | DP1RB |  | SP1LB |  | DP1LB |  | PR1B |  |
| 2nd Reading | SP2RB |  | DP2RB |  | SP2LB |  | DP2LB |  | PR2B |  |
| 3rd Reading | SP3RB |  | DP3RB |  | SP3LB |  | DP3LB |  | PR3B |  |
| Average | SPMRB |  | DPMRB |  | SPMLB |  | DPMLB |  | PRMB |  |

| **: Holter Monitoring** | |
| --- | --- |
| **HMB** | Has the patient's blood pressure been measured by Holter? Yes, No  If yes, complete the table below: |
|  | د.   | Items | Code | Systolic | Code | Diastolic | | --- | --- | --- | --- | --- | | Mean blood pressure while awake | SPWB |  | DPWB |  | | Mean blood pressure while asleep | SPSB |  | DPSB |  | | Mean 24-hour blood pressure | SPAB |  | DPMB |  | | Minimum 24-hour blood pressure | SPMINB |  | DPMINB |  | | Maximum 24-hour blood pressure | SPMAXB |  | DPMAXB |  | |

| Anthropometric Information (AN) | |
| --- | --- |
| AN1 | Height (cm): |
| AN2 | Weight (kg): |
| AN3 | Waist circumference (cm): |
| AN4 | Hip circumference (cm): |
