# Supplementary material for: gIncrease In Hypertension Control Rate following the Training of the Latest National- International Hypertension Management Guidelines for General Practitioners
Source: Research Square preprint supplement (doi:10.21203/rs.3.rs-7192375/v1), 2025-09-11
Supplement: Supplementary file 2 [file d682741197d4b70d94e27045.docx]

| ID1 | Center Name: | |
| --- | --- | --- |
| ID2 | Patient Code: |
| ID3 | Patient's Doctor's Name: | |
| ID4 | First Name: | |
| ID5 | Last Name: | |
| ID6 | National Code: | |
| ID7 | Initial Questionnaire Completion Date: | |
| ID8 | Current Questionnaire Completion Date: | |

**Questionnaire for Patients in the Study on the Effect of Applying National and International Hypertension Treatment Guidelines on its Control in Patients Undergoing Treatment (Phase II Evaluation)**

| **General Health Status** | |
| --- | --- |
| RF21A | How do you generally assess your overall health status?   * Very good   * Good   * Average   * Bad   * Very bad |
| **Hypertension (HTN) Status** | |
| HTN4A | Number of visits for blood pressure treatment with a general practitioner at the health center from the first phase of the study until now: |
| HTN5A | Number of visits for blood pressure treatment with a general practitioner outside the health center from the first phase of the study until now: |
| HTN6A | Number of visits for blood pressure treatment with a specialist from the first phase of the study until now: |
| HTN7A | If you have been seen by a specialist, what type of specialist was it? |
| HTN8A | Are you currently taking blood pressure medication?   1. Yes, regularly 2. Yes, irregularly 3. No |
| HTN9A | How many medications do you take per day to control your blood pressure? |

List the medications currently used to control the patient's blood pressure? (To be completed by referring to the patient's file, insurance booklet, doctor's prescription, and medication box)

| Drug Name | | Drug Dose | | Time of Consumption | | | | | | | |
| --- | --- | --- | --- | --- | --- | --- | --- | --- | --- | --- | --- |
| Morning | | Noon | | Afternoon | | Evening | |
| T1A |  | TZ1A |  | TT11A |  | TT12A |  | TT13A |  | TT14A |  |
| T2A |  | TZ3A |  | TT21A |  | TT22A |  | TT23A |  | TT24A |  |
| T3A |  | TZ3A |  | TT31A |  | TT32A |  | TT33A |  | TT34A |  |
| T4A |  | TZ4A |  | TT41A |  | TT42A |  | TT43A |  | TT44A |  |
| T5A |  | TZ5A |  | TT51A |  | TT52A |  | TT53A |  | TT54A |  |
| T6A |  | TZ6A |  | TT61A |  | TT62A |  | TT63A |  | TT64A |  |
| T7A |  | TZ7A |  | TT71A |  | TT72A |  | TT73A |  | TT74A |  |
| T8A |  | TZ8A |  | TT81A |  | TT82A |  | TT83A |  | TT84A |  |

| **Drug Adherence** | | **Yes** | **No** |
| --- | --- | --- | --- |
| DA1A | Have you ever forgotten to take your blood pressure medication? |  |  |
| DA2A | In the past two weeks, was there a day when you did not take your blood pressure medications? |  |  |
| DA3A | Have you ever felt worse after taking your blood pressure medications and, without consulting a doctor, stopped taking them or reduced the amount? |  |  |
| DA4A | Have you ever forgotten to take your blood pressure medication while traveling or away from home? |  |  |
| DA5A | Have you ever stopped taking your medications when you felt your blood pressure was under control? |  |  |
| DA6A | Have you ever run out of medication and waited a few days to follow up and continue your blood pressure treatment? |  |  |
| DA7A | Do you have trouble remembering that you have received all your blood pressure medications? |  |  |
| DA8A | Did you not receive your blood pressure medications yesterday? |  |  |

| Blood Pressure Table | **Right arm** | | | | **Left arm** | | | | **Pulse** | |
| --- | --- | --- | --- | --- | --- | --- | --- | --- | --- | --- |
| Systolic BP | | Diastolic BP | | Systolic BP | | Diastolic BP | |
| 1st Reading | SP1RA |  | DP1RA |  | SP1LA |  | DP1LA |  | PR1A |  |
| 2nd Reading | SP2RA |  | DP2RA |  | SP2LA |  | DP2LA |  | PR2A |  |
| 3rd Reading | SP3RA |  | DP3RA |  | SP3LA |  | DP3LA |  | PR3A |  |
| Average | SPMRA |  | DPMRA |  | SPMLA |  | DPMLA |  | PRMA |  |

| **Holter Monitoring** | |
| --- | --- |
| **HMA** | Has the patient's blood pressure been measured by Holter?   1. Yes 2. No |

If the patient's answer to the previous question is yes, attach the output of the Holter monitoring results and complete the following table:

|  | Systolic | | Diastolic | |
| --- | --- | --- | --- | --- |
| Mean blood pressure while awake | SPWA |  | DPWA |  |
| Mean blood pressure while asleep | SPSA |  | DPSA |  |
| Mean 24-hour blood pressure | SPAA |  | DPMA |  |
| Minimum 24-hour blood pressure | SPMINA |  | DPMINA |  |
| Maximum 24-hour blood pressure | SPMAXA |  | DPMAXA |  |
