# Supplementary material for: gIncrease In Hypertension Control Rate following the Training of the Latest National- International Hypertension Management Guidelines for General Practitioners
Source: Research Square preprint supplement (doi:10.21203/rs.3.rs-7192375/v1), 2025-09-11
Supplement: Supplementary file 3 [file ebfb83faad8b82b101b05963.docx]

Questionnaire for Physicians in the Study on the Effect of Applying National and International Hypertension Treatment Guidelines on its Control in Patients Undergoing Treatment (Phase II Evaluation)

**Informed Consent Form**

Dear Doctor,

Hello,

Thank you for your participation in this study. This project is being conducted to investigate the impact of training general practitioners on the latest national and international hypertension treatment guidelines, on their knowledge, attitude, and practice, and ultimately on the level of hypertension control in patients with hypertension.

All information in this questionnaire will remain confidential. Since this is a before-and-after study, including your full name in the questionnaire is necessary to link both the pre- and post-questionnaires belonging to the same physician.

Therefore, we kindly ask you to carefully answer all the questions in this questionnaire and help us by participating in this research and maintaining your cooperation until the end.

I, ...................................................., based on the information provided, have been informed about the objectives and details of this research and consent to participate in it.

Date:

Signature:

| PID1 | Name of the Comprehensive Health Service Center (physician's workplace): | |
| --- | --- | --- |
| PID2 | Physician Code: |
| PID3 | Physician's Name: | |
| PID4 | Questionnaire Completion Date: | |
| PID5 | Mobile Phone Number: | |

| **Knowledge Questions** | | | | | |
| --- | --- | --- | --- | --- | --- |
| KNA1 | | : What is the best time for a patient to measure their blood pressure at home?   1. Before taking medication 2. Two hours after taking medication 3. It doesn't matter 4. I don't know | | | |
| KNA2 | | What is the normal difference in systolic blood pressure between the two arms?   1. Up to 20 mmHg 2. Up to 10 mmHg 3. Up to 25 mmHg 4. I don't know | | | |
| KNA3 | | According to the latest guideline (AHA-2017), what is the target blood pressure level for a 70-year-old patient without comorbidities?   1. SAP ≤ 140 and DAP ≤ 90 2. SAP ≤ 150 and DAP ≤ 90 3. SAP ≤ 160 and DAP ≤ 90 4. SAP ≤ 135 and DAP ≤ 85 5. I don't know | | | |
| KNA4 | | If a small cuff is used to measure the blood pressure of obese individuals (arm circumference > 32 cm), what change occurs in the systolic pressure?   1. Systolic pressure is measured lower than the actual value 2. Systolic pressure is measured higher than the actual value 3. No change occurs 4. I don't know | | | |
| KNA5 | | What type of blood pressure monitor is the reference and gold standard for measuring blood pressure?   1. Aneroid 2. Automatic and semi-automatic 3. Mercury 4. I don't know | | | |
| KNA6 | | When is a patient's blood pressure considered high and uncontrolled during sleep, based on Holter monitoring? (The provided numbers are mean blood pressure).   1. SAP ≥ 135 and/or DAP ≥ 85 2. SAP ≥ 140 and/or DAP ≥ 90 3. SAP ≥ 120 and/or DAP ≥ 70 4. * I don't know | | | |
| KNA7 | | : What is the target point for treating HTN Urgency (sudden and severe increase in blood pressure without evidence of progressive or imminent organ damage)?   1. Reaching a target pressure of 160/110 mmHg 2. Reducing blood pressure by 20-30 mmHg 3. Reducing the mean blood pressure by 25% over the first 12 hours 4. All of the above 5. I don't know | | | |
| KNA8 | | In which cases should a general practitioner refer a hypertensive patient for further evaluation?   1. Patients with newly developed vital organ damage 2. Pregnant women 3. Individuals over 18 years old 4. Answers 1 and 2 are correct 5. I don't know | | | |
| KNA9 | | Which of the following recommendations is useful in treating resistant hypertension?   1. Increasing the diuretic dose 2. Simplifying the medication regimen to increase patient adherence 3. Using Furosemide in patients with kidney failure 4. All of the above 5. I don't know | | | |
| KNA10 | | Which drug combination is contraindicated in the treatment of a hypertensive patient?   1. ACEI and ARA 2. CCA and ARA 3. CCA and ACEI 4. Beta-blockers, CCA, and ACEI 5. I don't know   ACE1: angiotensin converting enzyme inhiAitor  ARA: Angiotensin II receptor Alockers  CCA: Calcium channel Alockers | | | |
| KNA11 | | Which medication is appropriate for treating pregnancy hypertension?   1. Labetalol, Methyldopa, Hydralazine, Nifedipine 2. ACEI and Labetalol 3. ARAs and CCA 4. ACEIs and Beta-blockers 5. I don't know | | | |
| KNA12 | | What is the DASH (Dietary Approaches to Stop Hypertension) diet?   1. A diet containing fruits, vegetables, low-fat dairy, fiber, whole grains, plant-based protein, and low saturated fats and cholesterol 2. Consumption of foods rich in magnesium, potassium, and calcium 3. Adding potassium, calcium, and magnesium supplements 4. Options 1 and 2 are correct 5. I don't know | | | |
| KNA13 | | In your opinion, what are the benefits of using combined blood pressure medications?   1. Ease of use and improved tolerability and patient satisfaction 2. More effective blood pressure reduction compared to single-drug therapy or separate multi-drug therapies 3. Reduction of side effects of high-dose single-drug therapy 4. All of the above 5. I don't know | | | |
| Are the listed drug combinations available in the Iranian market? | | | Yes | No | I don't know |
| KNA14 | | Valsartan 80 mg / Hydrochlorothiazide 12.5 mg |  |  |  |
| KNA15 | | Valsartan 160 mg / Hydrochlorothiazide 12.5 mg |  |  |  |
| KNA16 | | Valsartan 160 mg / Hydrochlorothiazide 25 mg |  |  |  |
| KNA17 | | Valsartan 80 mg / Amlodipine 5 mg |  |  |  |
| KNA18 | | Valsartan 160 mg / Amlodipine 5 mg |  |  |  |
| KNA19 | | Valsartan 160 mg / Amlodipine 10 mg |  |  |  |
| KNA20 | | Amlodipine 10 mg / Valsartan 160 mg / Hydrochlorothiazide 12.5 mg |  |  |  |
| KNA21 | | Amlodipine 5 mg / Valsartan 160 mg / Hydrochlorothiazide 12.5 mg |  |  |  |
| **Practice Questions** | | | | | |
| PRA1 | Have you ever used hypertension guidelines for treating patients?   1. Never 2. Sometimes 3. Most of the time 4. Always | | | | |
| PRA2 | Do you fully implement the directives from the Ministry of Health regarding the treatment and management of hypertension?   1. Never 2. Sometimes 3. Most of the time 4. Always | | | | |
| PRA3 | On the first visit, how many times do you measure a patient's blood pressure to determine the actual pressure?   1. From both arms at least twice, with a 1–2-minute interval 2. From the right or left arm at least twice 3. From the right or left arm once 4. None of the above | | | | |
| PRA4 | If the systolic blood pressure measured from both arms is different, which arm's blood pressure do you use for the next visit?   1. The arm with the lower pressure 2. The arm with the higher pressure 3. It doesn't matter 4. I don't know | | | | |
| PRA5 | According to the AHA-2017 guideline, in what cases do you start hypertension treatment from the very first visit?   1. Stage 1 hypertension (DAP: 80–89 or SAP: 130–139) 2. Stage 2 hypertension (DAP ≥ 90 or SAP ≥ 140) 3. HTN Crisis or hypertensive crisis (acute (severe, rapid) increase to SAP >180 and/or DAP >120) 4. In all of the above cases 5. I don't know | | | | |
| PRA6 | What actions do you take during a clinical examination of a hypertensive patient?   1. Blood pressure measurement, heart auscultation 2. Carotid, abdominal, and flank auscultation 3. Height and weight measurement 4. All of the above 5. None of the above | | | | |
| PRA7 | Do you remind the hypertensive patient of their next appointment date?   1. Never 2. Sometimes 3. Most of the time 4. Always | | | | |
| PRA8 | A 62-year-old man visits a doctor for a headache. His history shows no comorbidities or risk factors for atherosclerosis. His physical examination is normal. The average blood pressure in his right arm is 130/85 mmHg. According to the AHA-2017 guideline, which option is appropriate for the patient?   1. Start medication treatment from this first visit 2. Non-pharmacological treatment recommendations and patient follow-up are sufficient 3. If the patient's blood pressure does not decrease to less than 130/80 mmHg after 3 to 6 months of non-pharmacological treatment, start medication treatment 4. If medication treatment is needed, starting treatment with two drugs simultaneously is recommended | | | | |
| PRA9 | What type of exercise do you recommend for a hypertensive patient?   1. Endurance sports like weightlifting and boxing 2. Aerobic exercise like brisk walking for at least 30 minutes on most days of the week 3. Aerobic exercise like brisk walking for one hour in the morning and one hour in the evening every day 4. I do not recommend any exercise | | | | |
| PRA10 | You have prescribed an ARA or ACEI medication for a hypertensive patient, and their serum creatinine level has increased by 10%. What is your interpretation?   1. It should be considered kidney damage, and the kidneys need to be examined 2. Serum creatinine may increase by 20-30% after medication treatment 3. You stop the current blood pressure medications and prescribe other blood pressure medications 4. I don't know | | | | |
| PRA11 | During the examination of a hypertensive patient, you notice microalbuminuria in a spot urine sample. What is your interpretation?   1. Their blood pressure is not controlled 2. Their GFR should be measured 3. It is an indicator of kidney dysfunction or a strong predictor of future cardiovascular events and death 4. All of the above are correct 5. I don't know | | | | |
| **Attitude Questions** | | | | | |
| ATTA1 | | I trust the recommendations provided in the hypertension control guidelines.   1. Strongly disagree 2. Disagree 3. No opinion 4. Agree 5. Strongly agree | | | |
| ATTA2 | | Adhering to hypertension control guidelines facilitates doctors' work in treating patients.   1. Strongly disagree 2. Disagree 3. No opinion 4. Agree 5. Strongly agree | | | |
| ATTA3 | | Doctors' adherence to hypertension control guidelines will have favorable outcomes for the health system.   1. Strongly disagree 2. Disagree 3. No opinion 4. Agree 5. Strongly agree | | | |
| ATTA4 | | Adhering to hypertension control guidelines will reduce treatment costs.   1. Strongly disagree 2. Disagree 3. No opinion 4. Agree 5. Strongly agree | | | |
| ATTA5 | | A doctor's adherence to hypertension control guidelines reduces their independence.   1. Strongly disagree 2. Disagree 3. No opinion 4. Agree 5. Strongly agree | | | |
| ATTA6 | | Managing patients' hypertension using hypertension control guidelines is a very difficult and hard task.   1. Strongly disagree 2. Disagree 3. No opinion 4. Agree 5. Strongly agree | | | |
| ATTA7 | | It is also possible to fully manage hypertension without using hypertension control guidelines.   1. Strongly disagree 2. Disagree 3. No opinion 4. Agree 5. Strongly agree | | | |
| ATTA8 | | I believe that localizing the existing guidelines worldwide is necessary for our country.   1. Strongly disagree 2. Disagree 3. No opinion 4. Agree 5. Strongly agree | | | |
| ATTA9 | | The use of guidelines by doctors in treating patients will reduce the long-term complications of the disease.   1. Strongly disagree 2. Disagree 3. No opinion 4. Agree 5. Strongly agree | | | |
| ATTA10 | | In my opinion, localized guidelines do not have an executive guarantee.   1. Strongly disagree 2. Disagree 3. No opinion 4. Agree 5. Strongly agree | | | |
| ATTA11 | | : The lack of a summarized algorithm of the guidelines is one of the important barriers to not using them.   1. Strongly disagree 2. Disagree 3. No opinion 4. Agree 5. Strongly agree | | | |
